# Supplementary material
Source: PubMed Central journal article supplement (PMC2561303)
Supplement: NIHMS63071-supplement-1si20060117_11.pdf [file NIHMS63071-supplement-1si20060117_11.pdf]

# ***A Priori* Resolution of the Intermediate Spectra in the Bacteriorhodopsin Photocycle: The Time Evolution of the L Spectrum Revealed**

László Zimányi,<sup>\*†</sup> Jack Saltiel,<sup>\*\*‡</sup> Leonid S. Brown<sup>§</sup> and Janos K. Lanyi<sup>||</sup>

## **Supporting information**

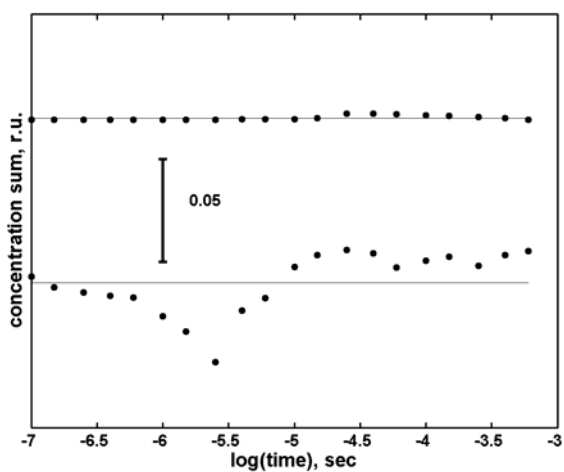

**Figure 1S:** Sum of the intermediate concentrations obtained by fitting the data with the spectra of **K**, **L<sub>1</sub>**, **L<sub>2</sub>**, **M** (top) and **K**, **L<sub>2</sub>**, **M**, (bottom).

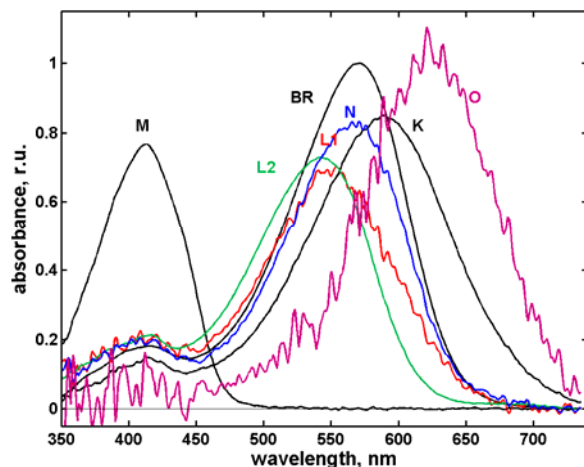

**Figure 2S:** Intermediate spectra obtained by **SVD-EFASM**. Note that the rather noisy **O** spectrum is due to the very low contribution of this intermediate at pH 6, 5°C (see Figure 3S). An **O** spectrum with a much higher S/N but similar shape was obtained from an experiment at 30°C, not shown here.

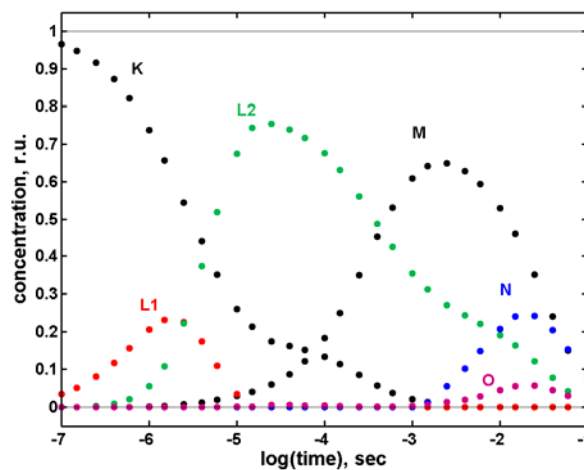

**Figure 3S:** Kinetics of the intermediates calculated by fitting the spectra provided by **SVD-EFASM** to the data. The kinetics are identical to those shown in Figure 5 for the first 20 points.
